# Supplementary material for: ESICCC as a systematic computational framework for evaluation, selection, and integration of cell-cell communication inference methods
Source: HighWire-hosted journal article supplement (doi:10.1101/gr.278001.123), 2023-10-01
Supplement: Supplemental_Tables.xlsx [file Supplemental_Tables.xlsx]

## Sheet: Index
Supplemental Tables Index
Supplemental Table 1: Characteristics of different CCC inference methods
Supplemental Table 2: Detailed information of prior databases
Supplemental Table 3: scRNA-seq and ST datasets used in benchmarking
Supplemental Table 4: Cell line perturbation-expression datasets used in benchmarking
Supplemental Table 5: Criteria for calculating usability score

## Sheet: Suppl_Table1
Supplemental Table 1: Characteristics of different CCC inference methods
Methods	Category	Level	Significance test	Intracellular signaling	Prior database information	Multi-subunit
CellPhoneDB v2	LR inference	cluster	Yes	No	[L-R]	Yes [Minimum]
CellPhoneDB v3	LR inference	cluster	Yes	No	[L-R]	Yes [Minimum]
CellTalker	LR inference	cluster	Yes	No	[L-R]	No
Connectome	LR inference	cluster	No	No	[L-R]	No
ICELLNET	LR inference	cluster	No	No	[L-R]	Yes [Geometric mean]
NATMI	LR inference	cluster	No	No	[L-R]	No
iTALK	LR inference	cluster	No	No	[L-R]	No
scConnect	LR inference	cluster	Yes	No	[L-R]	No
SingleCellSignalR	LR inference	cluster	No	No	[L-R]	No
CellChat	LR inference	cluster	Yes	No	[L-R]	Yes [Geometric mean]
RNA-Magnet	LR inference	sc-cluster/cluster	No	No	[L-R]	Yes [Minimum]
PyMINEr	LR inference	cluster	No	No	[L-R]	No
scSeqComm	LR inference	cluster	No	Yes	[L-R-TF]	Yes [Geometric mean]
Domino	LR inference	cluster	No	Yes	[L-R-TF]	No
CellCall	LR inference	cluster	No	Yes	[L-R-TF]	Yes [Geometric mean]
NicheNet	L/R-Target inference	cluster	No	Yes	[L-R, L-TG]	No
CytoTalk	L/R-Target inference	cluster	Yes	Yes	[L-R]	No
scMLnet	L/R-Target inference	cluster	No	Yes	[L-R-TF-TG]	No
MISTy	L/R-Target inference	cluster	No	Yes	No	No
HoloNet	L/R-Target inference	sc/cluster	Yes	Yes	No	No
stMLnet	L/R-Target inference	cluster	No	Yes	[L-R-TF-TG]	No

## Sheet: Suppl_Table2
Supplemental Table 2: Detailed information of prior databases
Databases	Species	Number of links	Multi-subunit	User-changeable
CellPhoneDB	human	546 L-R, 332 PPIs	Yes	Yes
CellTalker	human	2557 L-R	No	Yes
Connectome	human	2557 L-R	No	Yes
ICELLNET	human	1034 L-R	Yes	Yes
NATMI	human	2293 L-R	No	Yes
iTALK	human	2597 L-R	No	Yes
scConnect	human	510 L-R	No	No
	mouse	443 L-R
SingeCellSignalR	human	3239 L-R	No	No
CellChat	human	1938 L-R	Yes	Yes
	mouse	2017 L-R
	zebrafish	2774 L-R
RNAMagnet	mouse	Multiple databases of L-R	Yes	No
PyMINEr	human	1089076 PPIs	No	No
scSeqComm	human	Multiple databases of L-R, R-TF, TF-TG	Yes	Yes
	mouse	Multiple databases of L-R, R-TF, TF-TG
NicheNet	human	12019 L-R, 17437360 L-TG	No	Yes
CytoTalk	human	1942 L-R	No	Yes
	mouse	1855 L-R
scMLnet	human	2557 L-R, 39141 R-TF, 8874 TF-TG	No	Yes
Domino	human	944 L-R	No	Yes
CellCall	human	23027 L-R-TF, 591015 TF-TG	Yes	No
	mouse	12624 L-R-TF, 602110 TF-TG

## Sheet: Suppl_Table3
Supplemental Table 3: scRNA-seq and ST datasets used in benchmarking
Tissue (Disease)	SampleID		Literature PMID	Download		Evaluation purpose	Benchmarks
	scRNA-seq	ST		URL1	URL2
Heart tissue (Health)	CK357	control_P7	35948637	URL	URL	LR interactions, LR-Target regulations	DLRC benchmark, sampling benchmark
	CK358	control_P8	35948637	URL	URL	LR interactions, LR-Target regulations	DLRC benchmark, sampling benchmark
Heart tissue (ICM)	CK368	FZ_GT_P19	35948637	URL	URL	LR interactions	DLRC benchmark, sampling benchmark
	CK162	FZ_GT_P4	35948637	URL	URL	LR interactions	DLRC benchmark, sampling benchmark
	CK362	RZ_P11	35948637	URL	URL	LR interactions	DLRC benchmark, sampling benchmark
Heart tissue (AMI)	CK361	IZ_P10	35948637	URL	URL	LR interactions	DLRC benchmark, sampling benchmark
	CK161	IZ_P3	35948637	URL	URL	LR interactions	DLRC benchmark, sampling benchmark
	CK165	IZ_BZ_P2	35948637	URL	URL	LR interactions	DLRC benchmark, sampling benchmark
Tumor tissue (Breast cancer)	CID44971	CID44971	34493872	URL	URL	LR interactions, LR-Target regulations	DLRC benchmark, sampling benchmark
	CID4465	CID4465	34493872	URL	URL	LR interactions, LR-Target regulations	DLRC benchmark, sampling benchmark
Mouse embryo (Health)	Slide14	Slide14	34210887	URL	——	LR interactions	DLRC benchmark, sampling benchmark
PBMC	PBMC 4K	——	——	URL	——	LR interactions	CAGE and proteomics benchmarks, sampling benchmark
PBMC	PBMC 6K	——	——	URL	——	LR interactions	CAGE and proteomics benchmarks, sampling benchmark
PBMC	PBMC 8K	——	——	URL	——	LR interactions	CAGE and proteomics benchmarks, sampling benchmark
Tumor tissue (Gliomas)	——	UKF243_T_ST	35700707	URL	——	LR-Target regulations	perturbation benchmark
	——	UKF260_T_ST	35700707	URL	——	LR-Target regulations	perturbation benchmark
	——	UKF266_T_ST	35700707	URL	——	LR-Target regulations	perturbation benchmark
	——	UKF334_T_ST	35700707	URL	——	LR-Target regulations	perturbation benchmark

## Sheet: Suppl_Table4
Supplemental Table 4: Cell line perturbation-expression datasets used in benchmarking
Dataset	Perturbed Ligand/Receptor	Type	Condition	Cell Line	Disease
GSE120268	AXL	receptor	Knockdown	MDA-MB-231	Breast cancer
GSE157680	NRP1	receptor	Knockdown	MDA-MB-231	Breast cancer
GSE15893	CXCR4	receptor	Mutant	MDA-MB-231	Breast cancer
GSE15893	CXCL12	ligand	Treatment	MDA-MB-231	Breast cancer
GSE160990	TGFB1	ligand	Treatment	MDA-MB-231	Breast cancer
GSE36051	DLL4(1)	ligand	Treatment	MCF7	Breast cancer
GSE36051	DLL4(2)	ligand	Treatment	MDA-MB-231	Breast cancer
GSE36051	JAG1	ligand	Treatment	MDA-MB-231	Breast cancer
GSE65398	IGF1(1)	ligand	Treatment	MCF7	Breast cancer
GSE7561	IGF1(2)	ligand	Treatment	MCF7	Breast cancer
GSE69104	CSF1R	receptor	Inhibit	macrophages	Gliomas
GSE116414	FGFR1	receptor	Inhibit	glioma cells	Gliomas
GSE206947	EFNB2	ligand	Treatment	cardiac fibroblasts	Health
GSE181575	TGFB1	ligand	Treatment	cardiac fibroblasts	Health
GSE123018	TGFB1	ligand	Treatment	cardiac fibroblasts	Health

## Sheet: Suppl_Table5
Supplemental Table 5: Criteria for calculating usability score
Time	Score_time		Memory	Score_memory
≤1min	1		≤1GB	1
1~5min	0.9		1~5GB	0.9
5~10min	0.8		5~10GB	0.8
10~30min	0.7		10~15GB	0.7
30~60min (1h)	0.6		15~20GB	0.6
1~12h	0.5		20~25GB	0.5
12~24h (1d)	0.4		25~30GB	0.4
1~2d	0.3		30~35GB	0.3
2~3d	0.2		35~40GB	0.2
＞3d	0.1		＞40GB	0.1
